# Supplementary material
Source: ML conference proceedings conference paper supplement (https://aclanthology.org/2020.emnlp-main.489)

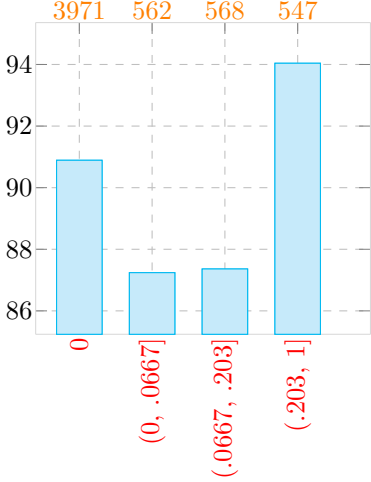

Supplement: OptionalSupplementaryMaterial [file 2020.emnlp-main.489.OptionalSupplementaryMaterial.zip]

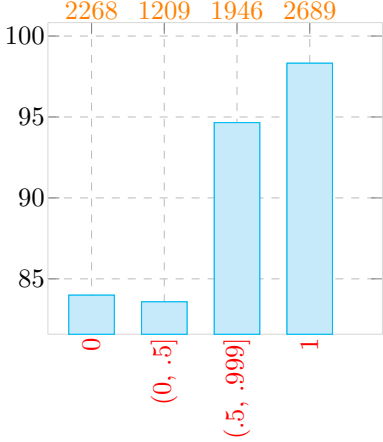

Supplement: OptionalSupplementaryMaterial [file 2020.emnlp-main.489.OptionalSupplementaryMaterial.zip]

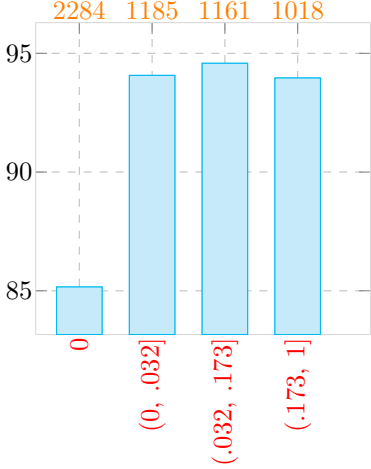

Supplement: OptionalSupplementaryMaterial [file 2020.emnlp-main.489.OptionalSupplementaryMaterial.zip]

1668 702 1661 1617

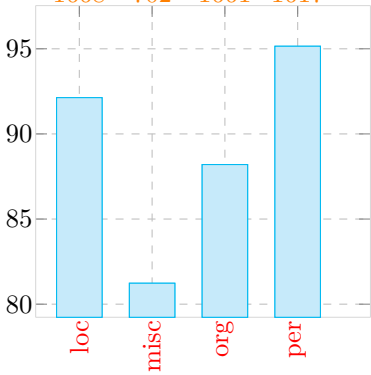

Supplement: OptionalSupplementaryMaterial [file 2020.emnlp-main.489.OptionalSupplementaryMaterial.zip]

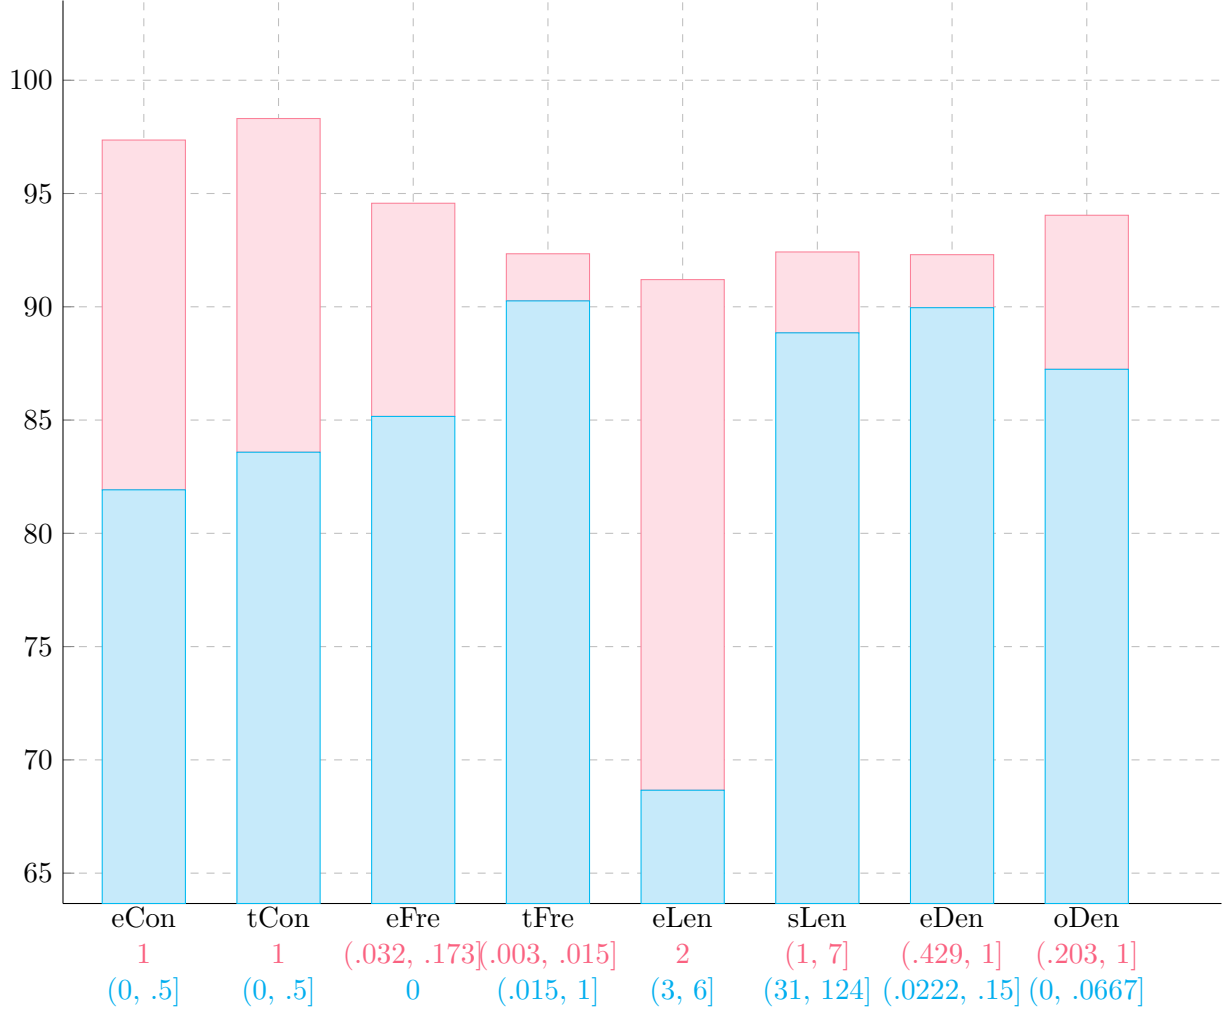

Supplement: OptionalSupplementaryMaterial [file 2020.emnlp-main.489.OptionalSupplementaryMaterial.zip]

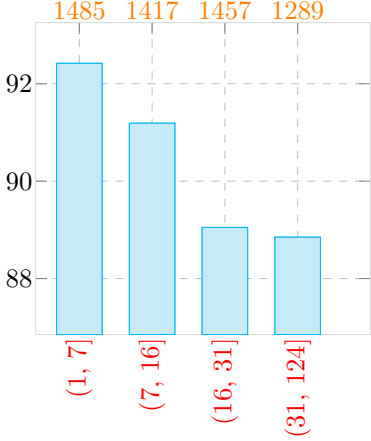

Supplement: OptionalSupplementaryMaterial [file 2020.emnlp-main.489.OptionalSupplementaryMaterial.zip]



Supplement: OptionalSupplementaryMaterial [file 2020.emnlp-main.489.OptionalSupplementaryMaterial.zip]

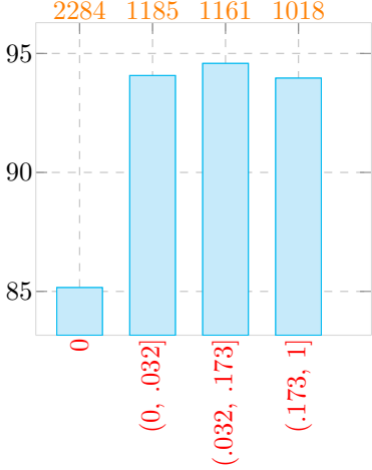

Supplement: OptionalSupplementaryMaterial [file 2020.emnlp-main.489.OptionalSupplementaryMaterial.zip]

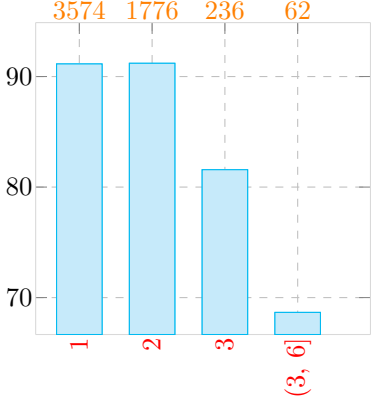

Supplement: OptionalSupplementaryMaterial [file 2020.emnlp-main.489.OptionalSupplementaryMaterial.zip]

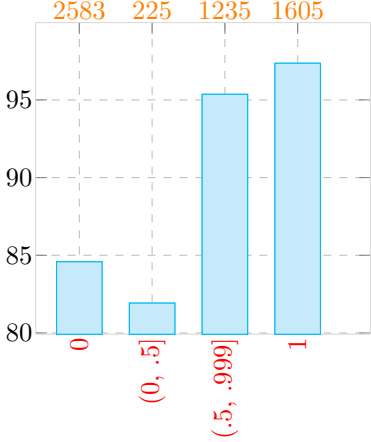

Supplement: OptionalSupplementaryMaterial [file 2020.emnlp-main.489.OptionalSupplementaryMaterial.zip]

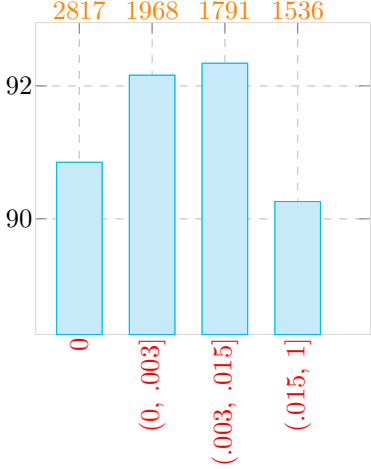

Supplement: OptionalSupplementaryMaterial [file 2020.emnlp-main.489.OptionalSupplementaryMaterial.zip]

1668 702 1661 1617



Supplement: OptionalSupplementaryMaterial [file 2020.emnlp-main.489.OptionalSupplementaryMaterial.zip]



Supplement: OptionalSupplementaryMaterial [file 2020.emnlp-main.489.OptionalSupplementaryMaterial.zip]

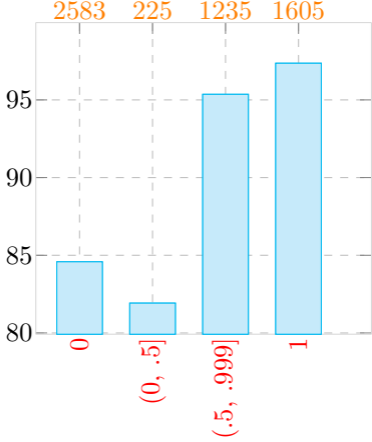

Supplement: OptionalSupplementaryMaterial [file 2020.emnlp-main.489.OptionalSupplementaryMaterial.zip]



Supplement: OptionalSupplementaryMaterial [file 2020.emnlp-main.489.OptionalSupplementaryMaterial.zip]



Supplement: OptionalSupplementaryMaterial [file 2020.emnlp-main.489.OptionalSupplementaryMaterial.zip]



Supplement: OptionalSupplementaryMaterial [file 2020.emnlp-main.489.OptionalSupplementaryMaterial.zip]



Supplement: OptionalSupplementaryMaterial [file 2020.emnlp-main.489.OptionalSupplementaryMaterial.zip]



Supplement: OptionalSupplementaryMaterial [file 2020.emnlp-main.489.OptionalSupplementaryMaterial.zip]



Supplement: OptionalSupplementaryMaterial [file 2020.emnlp-main.489.OptionalSupplementaryMaterial.zip]



Supplement: OptionalSupplementaryMaterial [file 2020.emnlp-main.489.OptionalSupplementaryMaterial.zip]

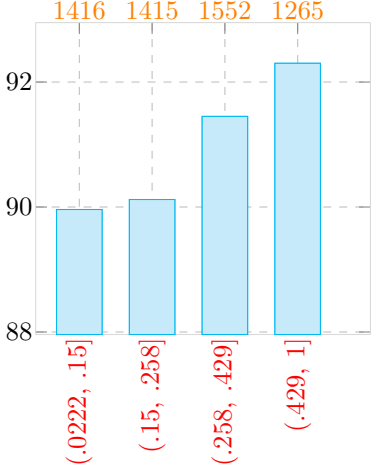

Supplement: OptionalSupplementaryMaterial [file 2020.emnlp-main.489.OptionalSupplementaryMaterial.zip]

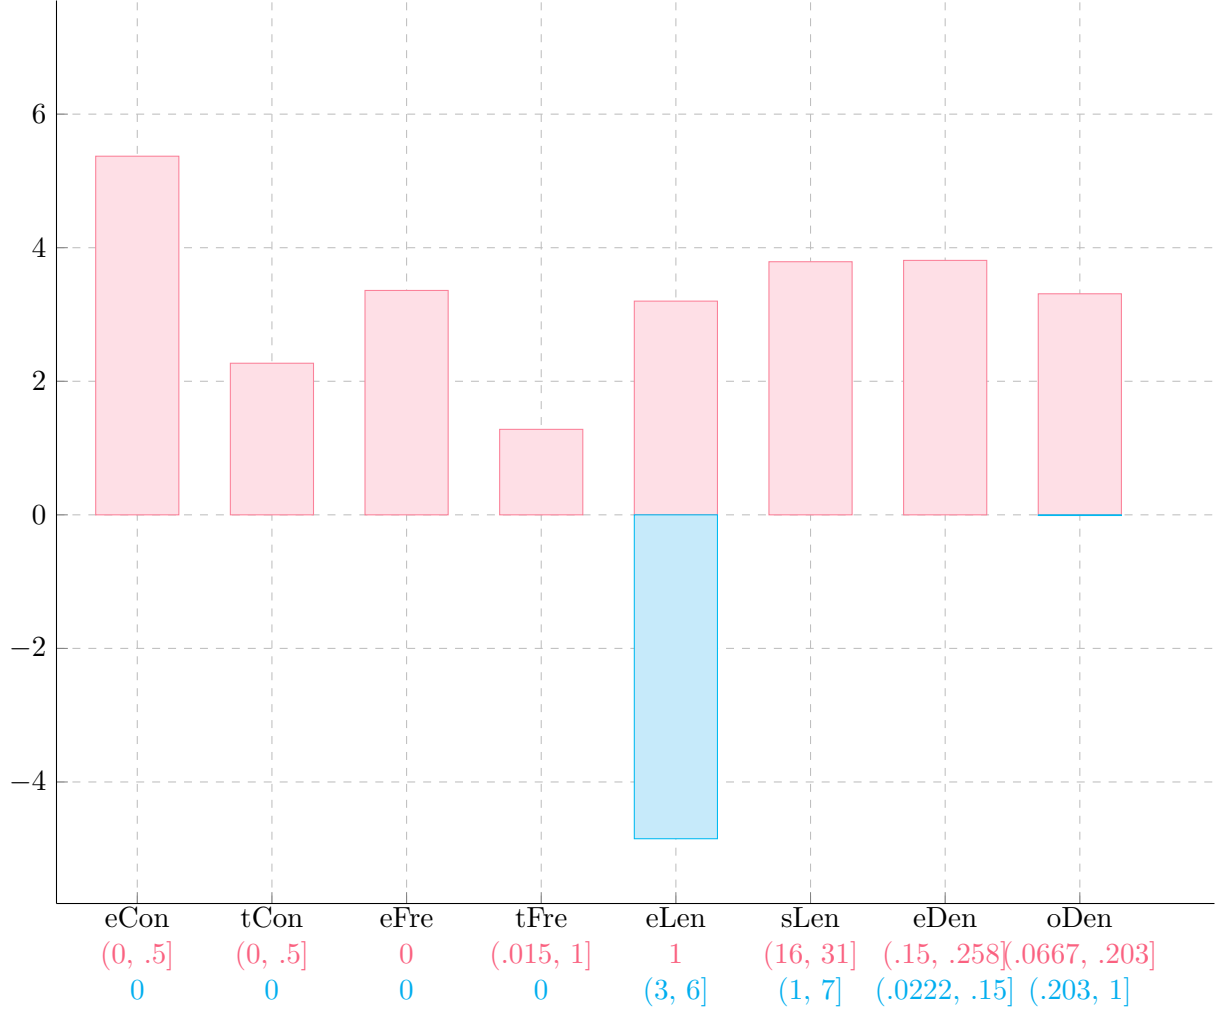

Supplement: OptionalSupplementaryMaterial [file 2020.emnlp-main.489.OptionalSupplementaryMaterial.zip]



Supplement: OptionalSupplementaryMaterial [file 2020.emnlp-main.489.OptionalSupplementaryMaterial.zip]



Supplement: OptionalSupplementaryMaterial [file 2020.emnlp-main.489.OptionalSupplementaryMaterial.zip]

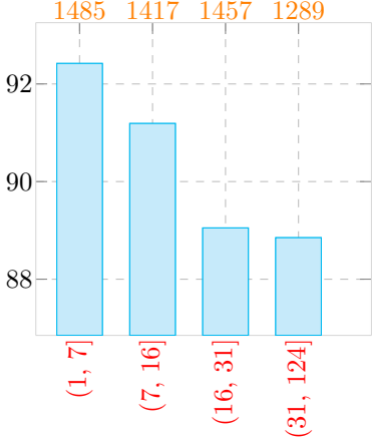

Supplement: OptionalSupplementaryMaterial [file 2020.emnlp-main.489.OptionalSupplementaryMaterial.zip]



Supplement: OptionalSupplementaryMaterial [file 2020.emnlp-main.489.OptionalSupplementaryMaterial.zip]



Supplement: OptionalSupplementaryMaterial [file 2020.emnlp-main.489.OptionalSupplementaryMaterial.zip]



Supplement: OptionalSupplementaryMaterial [file 2020.emnlp-main.489.OptionalSupplementaryMaterial.zip]



Supplement: OptionalSupplementaryMaterial [file 2020.emnlp-main.489.OptionalSupplementaryMaterial.zip]



Supplement: OptionalSupplementaryMaterial [file 2020.emnlp-main.489.OptionalSupplementaryMaterial.zip]



Supplement: OptionalSupplementaryMaterial [file 2020.emnlp-main.489.OptionalSupplementaryMaterial.zip]



Supplement: OptionalSupplementaryMaterial [file 2020.emnlp-main.489.OptionalSupplementaryMaterial.zip]



Supplement: OptionalSupplementaryMaterial [file 2020.emnlp-main.489.OptionalSupplementaryMaterial.zip]



Supplement: OptionalSupplementaryMaterial [file 2020.emnlp-main.489.OptionalSupplementaryMaterial.zip]



Supplement: OptionalSupplementaryMaterial [file 2020.emnlp-main.489.OptionalSupplementaryMaterial.zip]



Supplement: OptionalSupplementaryMaterial [file 2020.emnlp-main.489.OptionalSupplementaryMaterial.zip]
